# Supplementary material
Source: PubMed Central journal article supplement (PMC3457139)
Supplement: JVI.01563-12_zjv999096666so1.pdf [file JVI.01563-12_zjv999096666so1.pdf]

**Supplementary Table 1 Summary of Dose-response Curve Parameters in Macaques**

| <b>Drug</b>                | <b>IC<sub>50</sub> (μM)</b> | <b>m value</b> | <b>r<sup>2</sup></b> |
|----------------------------|-----------------------------|----------------|----------------------|
| <b>NRTI</b>                |                             |                |                      |
| 3TC                        | 1.507 ±0.374                | 1.17 ±0.12     | 0.997 ±0.002         |
| ABC                        | 0.986 ±0.233                | 1.25 ±0.14     | 0.985 ±0.007         |
| AZT                        | 0.077 ±0.013                | 0.61 ±0.10     | 0.985 ±0.011         |
| d4T                        | 0.945 ±0.286                | 0.77 ±0.11     | 0.983 ±0.008         |
| ddI                        | 1.836 ±0.481                | 1.24 ±0.18     | 0.986 ±0.004         |
| FTC                        | 0.687 ±0.129                | 1.25 ±0.08     | 0.995 ±0.003         |
| TDF                        | 2.152 ±0.698                | 1.07 ±0.14     | 0.980 ±0.009         |
| <b>Protease inhibitor</b>  |                             |                |                      |
| ATV                        | 0.162 ±0.047                | 2.65 ±0.21     | 0.992 ±0.005         |
| APV                        | 1.081 ±0.242                | 2.48 ±0.23     | 0.989 ±0.008         |
| DRV                        | 0.039 ±0.008                | 2.47 ±0.17     | 0.997 ±0.002         |
| IDV                        | 0.127 ±0.035                | 2.94 ±0.33     | 0.994 ±0.003         |
| LPV                        | 0.042 ±0.013                | 2.40 ±0.25     | 0.984 ±0.010         |
| NFV                        | 0.781 ±0.250                | 2.39 ±0.23     | 0.992 ±0.004         |
| SQV                        | 0.031 ±0.009                | 2.45 ±0.20     | 0.985 ±0.009         |
| TPV                        | 0.311 ±0.056                | 2.40 ±0.24     | 0.988 ±0.005         |
| <b>Fusion inhibitor</b>    |                             |                |                      |
| T1249                      | 0.628 ±0.209                | 1.75 ±0.14     | 0.988 ±0.006         |
| T20                        | 1.302 ±0.317                | 1.84 ±0.07     | 0.994 ±0.003         |
| <b>Integrase inhibitor</b> |                             |                |                      |
| L870812                    | 0.102 ±0.024                | 0.95 ±0.08     | 0.995 ±0.003         |
| RAL                        | 0.030 ±0.004                | 0.97 ±0.06     | 0.999 ±0.001         |

Values are means ±s.d. from 3 independent experiments.

**Supplementary Table 2 A Comparison of IIP Values in Macaques and Humans**

| <b>Drug</b> | <b>IIP<sub>max</sub><br/>Macaque</b> | <b>IIP<sub>max</sub><sup>a</sup><br/>Human</b> | <b>IIP<sub>ave</sub><sup>a</sup><br/>Human</b> |
|-------------|--------------------------------------|------------------------------------------------|------------------------------------------------|
| AZT         | 1.75                                 | 1.23                                           | 0.50                                           |
| TDF         | 2.08                                 | 0.86                                           | 0.57                                           |
| L870812     | 2.20                                 | ND <sup>b</sup>                                | ND <sup>b</sup>                                |
| ATV/r       | 4.38                                 | 7.17                                           | 6.20                                           |
| DRV/r       | 6.04                                 | 10.14                                          | 9.47                                           |

Values are means from 3 independent experiments.

<sup>a</sup>IIP<sub>max</sub> and IIP<sub>ave</sub> values in humans are adapted from Shen *et al.* (reference 32).

<sup>b</sup>IIP values for L870812 in humans are not determined (ND).

### Supplementary Table 3 Summary of Dose-response Curve Parameters in Humans

[Adapted from Shen *et al.* (reference 32)]

| <b>Drug</b>                | <b>IC<sub>50</sub> (nM)</b> | <b>m value</b> | <b>r<sup>2</sup></b> |
|----------------------------|-----------------------------|----------------|----------------------|
| <b>NRTI</b>                |                             |                |                      |
| 3TC                        | 29.8 ± 12.7                 | 1.15 ± 0.12    | 0.987 ± 0.007        |
| ABC                        | 34.4 ± 15.9                 | 0.95 ± 0.15    | 0.970 ± 0.005        |
| AZT                        | 182.3 ± 50.3                | 0.85 ± 0.12    | 0.988 ± 0.008        |
| d4T                        | 552.4 ± 199.3               | 1.13 ± 0.14    | 0.986 ± 0.008        |
| ddI                        | 179.4 ± 36.3                | 1.07 ± 0.17    | 0.966 ± 0.012        |
| FTC                        | 7.4 ± 3.0                   | 1.18 ± 0.10    | 0.988 ± 0.006        |
| TDF                        | 168.4 ± 37.3                | 0.97 ± 0.13    | 0.972 ± 0.013        |
| <b>Protease inhibitor</b>  |                             |                |                      |
| ATV                        | 13.6 ± 1.6                  | 2.69 ± 0.28    | 0.986 ± 0.010        |
| APV                        | 144.2 ± 18.2                | 2.09 ± 0.14    | 0.990 ± 0.009        |
| DRV                        | 23.6 ± 5.1                  | 3.61 ± 0.32    | 0.993 ± 0.005        |
| IDV                        | 90.9 ± 10.0                 | 4.53 ± 0.36    | 0.982 ± 0.009        |
| LPV                        | 35.8 ± 7.2                  | 2.05 ± 0.12    | 0.992 ± 0.005        |
| NFV                        | 166.8 ± 44.8                | 1.81 ± 0.23    | 0.987 ± 0.010        |
| SQV                        | 45.3 ± 4.4                  | 3.68 ± 0.23    | 0.995 ± 0.006        |
| TPV                        | 242.0 ± 43.6                | 2.51 ± 0.36    | 0.993 ± 0.005        |
| <b>Fusion inhibitor</b>    |                             |                |                      |
| T1249                      | 11.2 ± 4.6                  | 1.97 ± 0.17    | 0.966 ± 0.007        |
| T20                        | 35.9 ± 6.8                  | 1.65 ± 0.14    | 0.992 ± 0.002        |
| <b>Integrase inhibitor</b> |                             |                |                      |
| L870812                    | 228.2 ± 91.1                | 0.99 ± 0.08    | 0.995 ± 0.003        |
| RAL                        | 14.9 ± 1.8                  | 1.10 ± 0.05    | 0.987 ± 0.007        |

Values are means ± s.d.
